# Supplementary material
Source: PubMed Central journal article supplement (PMC3509744)
Supplement: NIHMS417176-supplement-esi.pdf [file NIHMS417176-supplement-esi.pdf]

| Protocol Name   | Sample ID       | Tox21 ID | Structure                                                                           | Sample Name                     | Curve Class | Curve Class2 | AC50(uM) | Max Resp  |
|-----------------|-----------------|----------|-------------------------------------------------------------------------------------|---------------------------------|-------------|--------------|----------|-----------|
| luc-cqno-3d7-f1 | Artemisinin     |          | 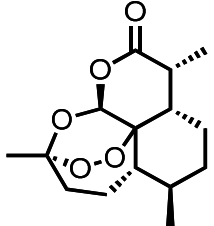   |                                 | -1.1        | -1.1         | 0.0124   | -102.0762 |
| luc-cqno-3d7-f1 | Artemisinin     |          |    |                                 | -1.1        | -1.1         | 0.011    | -102.9701 |
| luc-cqno-3d7-f1 | Mefloquine      |          |    |                                 | -1.1        | -1.1         | 0.0174   | -101.2797 |
| luc-cqno-3d7-f1 | Mefloquine      |          |  |                                 | -1.1        | -1.1         | 0.0196   | -17.3035  |
| luc-cqno-3d7-f1 | NCGC00015800-02 |          |  | 4-Phenyl-3-furoxan carbonitrile | -2.3        | -2.1         | 17.8691  | -100.8692 |
| luc-cqno-3d7-f1 | NCGC00015800-02 |          |  | 4-Phenyl-3-furoxan carbonitrile | -2.1        | -2.1         | 17.8691  | -101.4002 |

|                 |                 |                                                                                      |         |      |      |         |           |
|-----------------|-----------------|--------------------------------------------------------------------------------------|---------|------|------|---------|-----------|
| luc-cqno-3d7-f1 | NCGC00015800-04 | 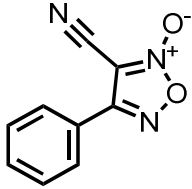    | Furoxan | -2.1 | -2.1 | 17.8691 | -101.3662 |
| luc-cqno-3d7-f1 | NCGC00015800-04 |     | Furoxan | -2.1 | -2.1 | 7.9818  | -101.4129 |
| luc-cqno-3d7-f1 | NCGC00015800-07 |     |         | -3   | -3   | 15.9258 | -95.0107  |
| luc-cqno-3d7-f1 | NCGC00015800-07 |    |         | -3   | -3   | 20.0494 | -95.3835  |
| luc-cqno-3d7-f1 | NCGC00052312-01 |  |         | 4    | 4    |         | -57.2535  |
| luc-cqno-3d7-f1 | NCGC00052312-01 |  |         | 4    | 4    |         | -46.9811  |
| luc-cqno-3d7-f1 | NCGC00167919-01 |   |         | -2.1 | -2.1 | 22.4958 | -94.9386  |

|                 |                 |                                                                                     |      |      |         |           |
|-----------------|-----------------|-------------------------------------------------------------------------------------|------|------|---------|-----------|
| luc-cqno-3d7-f1 | NCGC00167919-01 | 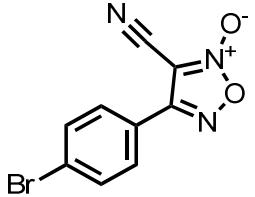   | -2.3 | -2.1 | 17.8691 | -85.584   |
| luc-cqno-3d7-f1 | NCGC00167920-01 |    | -2.1 | -2.2 | 15.9258 | -82.7008  |
| luc-cqno-3d7-f1 | NCGC00167920-01 |    | -2.1 | -2.1 | 20.0494 | -95.9436  |
| luc-cqno-3d7-f1 | NCGC00167922-01 |   | -2.1 | -2.1 | 17.8691 | -98.2372  |
| luc-cqno-3d7-f1 | NCGC00167922-01 |  | -3   | -3   | 20.0494 | -98.1622  |
| luc-cqno-3d7-f1 | NCGC00167923-01 |  | -3   | -3   | 17.8691 | -101.0187 |
| luc-cqno-3d7-f1 | NCGC00167923-01 |  | -2.3 | -2.1 | 17.8691 | -96.9626  |

|                 |                 |                                                                                     |      |      |         |           |
|-----------------|-----------------|-------------------------------------------------------------------------------------|------|------|---------|-----------|
| luc-cqno-3d7-f1 | NCGC00167924-01 | 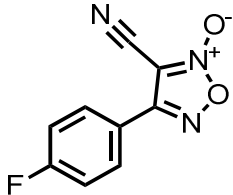   | -3   | -3   | 22.4958 | -103.129  |
| luc-cqno-3d7-f1 | NCGC00167924-01 |    | -2.1 | -2.1 | 17.8691 | -102.9103 |
| luc-cqno-3d7-f1 | NCGC00167925-01 |    | -1.1 | -1.1 | 5.0362  | -103.1215 |
| luc-cqno-3d7-f1 | NCGC00167925-01 |   | -1.1 | -1.1 | 5.6507  | -103.254  |
| luc-cqno-3d7-f1 | NCGC00167926-01 |  | -2.1 | -3   | 20.0494 | -99.8579  |
| luc-cqno-3d7-f1 | NCGC00167926-01 |  | -2.1 | -3   | 22.4958 | -99.3671  |
| luc-cqno-3d7-f1 | NCGC00167927-01 |  | -3   | -3   | 17.8691 | -100.1646 |

|                 |                 |                                                                                     |      |      |         |          |
|-----------------|-----------------|-------------------------------------------------------------------------------------|------|------|---------|----------|
| luc-cqno-3d7-f1 | NCGC00167927-01 | 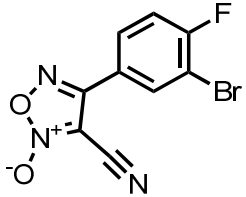   | -2.3 | -2.1 | 15.9258 | -98.815  |
| luc-cqno-3d7-f1 | NCGC00167928-01 |    | -3   | -3   | 17.8691 | -99.7691 |
| luc-cqno-3d7-f1 | NCGC00167928-01 |    | -2.1 | -2.1 | 15.9258 | -98.2321 |
| luc-cqno-3d7-f1 | NCGC00167929-01 |   | -3   | -3   | 20.0494 | -91.2782 |
| luc-cqno-3d7-f1 | NCGC00167929-01 |  | -3   | -3   | 17.8691 | -92.434  |
| luc-cqno-3d7-f1 | NCGC00167930-01 |  | 4    | 4    | 0.3178  | -21.7228 |
| luc-cqno-3d7-f1 | NCGC00167930-01 |  | 4    | 4    | 0.3178  | -1.5576  |

|                 |                 |                                                                                     |      |      |         |          |
|-----------------|-----------------|-------------------------------------------------------------------------------------|------|------|---------|----------|
| luc-cqno-3d7-f1 | NCGC00167931-01 | 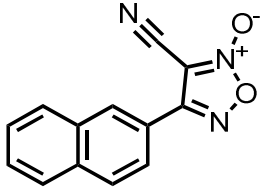   | -2.3 | -2.1 | 20.0494 | -94.1995 |
| luc-cqno-3d7-f1 | NCGC00167931-01 |    | 4    | 4    |         | -93.4492 |
| luc-cqno-3d7-f1 | NCGC00167932-01 |    | -3   | -3   | 20.0494 | -96.9323 |
| luc-cqno-3d7-f1 | NCGC00167932-01 |   | -3   | -3   | 20.0494 | -97.1867 |
| luc-cqno-3d7-f1 | NCGC00167933-01 |  | 4    | 4    | 6.3402  | -69.1418 |
| luc-cqno-3d7-f1 | NCGC00167933-01 |  | 2.4  | 2.2  | 4.4885  | -41.5952 |
| luc-cqno-3d7-f1 | NCGC00167934-01 |  | -2.1 | -2.2 | 15.9258 | -97.9543 |

|                 |                 |                                                                                      |      |      |         |          |
|-----------------|-----------------|--------------------------------------------------------------------------------------|------|------|---------|----------|
| luc-cqno-3d7-f1 | NCGC00167934-01 | 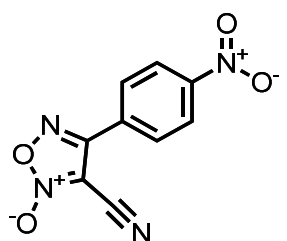   | -2.1 | -2.1 | 17.8691 | -96.2503 |
| luc-cqno-3d7-f1 | NCGC00167935-01 |    | -2.3 | -2.1 | 20.0494 | -98.2513 |
| luc-cqno-3d7-f1 | NCGC00167935-01 |    | -2.3 | -3   | 20.0494 | -98.0901 |
| luc-cqno-3d7-f1 | NCGC00167936-01 |   | -2.1 | -2.1 | 14.1939 | -96.7939 |
| luc-cqno-3d7-f1 | NCGC00167936-01 |  | -2.1 | -2.1 | 14.1939 | -96.7295 |
| luc-cqno-3d7-f1 | NCGC00167937-01 |  | -2.1 | -2.1 | 15.9258 | -96.7623 |
| luc-cqno-3d7-f1 | NCGC00167937-01 |  | -2.1 | -2.1 | 14.1939 | -96.715  |

|                 |                 |                                                                                      |      |      |         |           |
|-----------------|-----------------|--------------------------------------------------------------------------------------|------|------|---------|-----------|
| luc-cqno-3d7-f1 | NCGC00167938-01 | 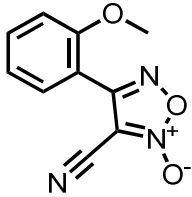    | -2.4 | -2.2 | 20.0494 | -68.9235  |
| luc-cqno-3d7-f1 | NCGC00167938-01 |     | -2.4 | -2.4 | 15.9258 | -57.9218  |
| luc-cqno-3d7-f1 | NCGC00167939-01 |    | -3   | -3   | 20.0494 | -100.4018 |
| luc-cqno-3d7-f1 | NCGC00167939-01 |   | -3   | -3   | 22.4958 | -100.0703 |
| luc-cqno-3d7-f1 | NCGC00167940-01 |  | -2.1 | -2.1 | 17.8691 | -91.4315  |
| luc-cqno-3d7-f1 | NCGC00167940-01 |  | -2.4 | -2.2 | 20.0494 | -60.3789  |
| luc-cqno-3d7-f1 | NCGC00167941-01 |  | -2.1 | -2.1 | 20.0494 | -98.6531  |



|                 |                 |                                                                                      |      |      |         |          |
|-----------------|-----------------|--------------------------------------------------------------------------------------|------|------|---------|----------|
| luc-cqno-3d7-f1 | NCGC00167941-01 | 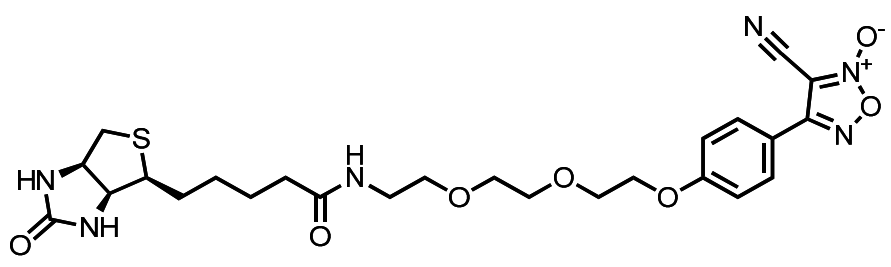   | -2.1 | -3   | 20.0494 | -98.7541 |
| luc-cqno-3d7-f1 | NCGC00167942-01 |    | -2.1 | -2.1 | 14.1939 | -97.1847 |
| luc-cqno-3d7-f1 | NCGC00167942-01 |    | -2.1 | -2.1 | 14.1939 | -97.2527 |
| luc-cqno-3d7-f1 | NCGC00167943-01 |   | -2.1 | -2.1 | 17.8691 | -99.3472 |
| luc-cqno-3d7-f1 | NCGC00167943-01 |  | -2.1 | -2.1 | 20.0494 | -99.3833 |
| luc-cqno-3d7-f1 | NCGC00167944-01 |  | 4    | 4    |         | -54.4963 |

|                 |                 |                                                                                     |      |      |         |          |
|-----------------|-----------------|-------------------------------------------------------------------------------------|------|------|---------|----------|
| luc-cqno-3d7-f1 | NCGC00167944-01 | 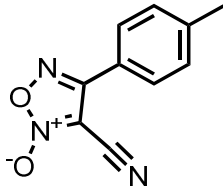   | -2.4 | -2.2 | 15.9258 | -51.5392 |
| luc-cqno-3d7-f1 | NCGC00168361-01 |    | 4    | 4    |         | -22.6829 |
| luc-cqno-3d7-f1 | NCGC00168361-01 |    | 4    | 4    |         | -25.1661 |
| luc-cqno-3d7-f1 | NCGC00168362-01 |   | 4    | 4    | 0.7982  | -20.0588 |
| luc-cqno-3d7-f1 | NCGC00168362-01 |  | 4    | 4    | 12.6503 | -29.8427 |
| luc-cqno-3d7-f1 | NCGC00168363-01 |  | 4    | 4    | 17.8691 | -16.1282 |
| luc-cqno-3d7-f1 | NCGC00168363-01 |  | -3   | -3   | 15.9258 | -39.8201 |

|                 |                 |                                                                                      |      |      |         |           |
|-----------------|-----------------|--------------------------------------------------------------------------------------|------|------|---------|-----------|
| luc-cqno-3d7-f1 | NCGC00168364-01 | 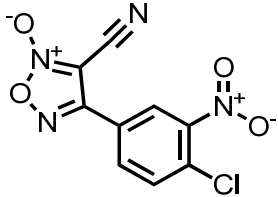   | -2.1 | -2.1 | 15.9258 | -103.139  |
| luc-cqno-3d7-f1 | NCGC00168364-01 |    | -2.1 | -2.1 | 17.8691 | -103.252  |
| luc-cqno-3d7-f1 | NCGC00168365-01 |    | -2.1 | -2.1 | 15.9258 | -98.9526  |
| luc-cqno-3d7-f1 | NCGC00168365-01 |   | -3   | -3   | 20.0494 | -101.3222 |
| luc-cqno-3d7-f1 | NCGC00168366-01 |  | -1.3 | -1.1 | 5.6507  | -101.5759 |
| luc-cqno-3d7-f1 | NCGC00168366-01 |  | -1.1 | -1.1 | 6.3402  | -101.5887 |
| luc-cqno-3d7-f1 | NCGC00168367-01 |  | -2.1 | -2.1 | 15.9258 | -99.8314  |

|                 |                 |                                                                                     |      |      |         |           |
|-----------------|-----------------|-------------------------------------------------------------------------------------|------|------|---------|-----------|
| luc-cqno-3d7-f1 | NCGC00168367-01 | 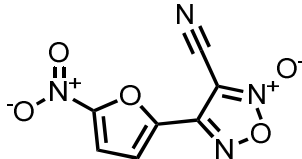  | -2.1 | -2.1 | 14.1939 | -100.8953 |
| luc-cqno-3d7-f1 | NCGC00168368-01 |   | -2.1 | -2.1 | 17.8691 | -100.2602 |
| luc-cqno-3d7-f1 | NCGC00168368-01 |   | -2.1 | -2.3 | 17.8691 | -93.5116  |
| luc-cqno-3d7-f1 | NCGC00168369-01 |    | 4    | 4    |         | -25.7441  |
| luc-cqno-3d7-f1 | NCGC00168369-01 |  | 4    | 4    | 2.5241  | -20.5994  |
| luc-cqno-3d7-f1 | NCGC00168370-01 |  | 4    | 4    | 11.2746 | -14.2432  |
| luc-cqno-3d7-f1 | NCGC00168370-01 |  | 4    | 4    | 0.0002  | -25.8499  |
| luc-cqno-3d7-f1 | NCGC00168371-01 |  | 4    | 4    | 0.0002  | 5.072     |

|                 |                 |                                                                                     |    |    |         |          |
|-----------------|-----------------|-------------------------------------------------------------------------------------|----|----|---------|----------|
| luc-cqno-3d7-f1 | NCGC00168371-01 | 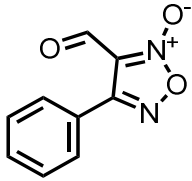   | 4  | 4  | 0.0002  | 8.5625   |
| luc-cqno-3d7-f1 | NCGC00181054-01 |    | 4  | 4  |         | -8.6835  |
| luc-cqno-3d7-f1 | NCGC00181054-01 |    | 4  | 4  | 22.4958 | -13.0326 |
| luc-cqno-3d7-f1 | NCGC00181055-01 |    | -3 | -3 | 20.0494 | -72.1728 |
| luc-cqno-3d7-f1 | NCGC00181055-01 |  | -3 | -3 | 17.8691 | -61.6256 |
| luc-cqno-3d7-f1 | NCGC00181056-01 |  | 4  | 4  | 0.0142  | -17.5351 |
| luc-cqno-3d7-f1 | NCGC00181056-01 |  | 4  | 4  |         | -21.4856 |

|                 |                 |                                                                                      |      |      |         |           |
|-----------------|-----------------|--------------------------------------------------------------------------------------|------|------|---------|-----------|
| luc-cqno-3d7-f1 | NCGC00181057-01 | 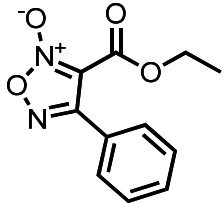    | 4    | 4    | 0.0283  | -25.4052  |
| luc-cqno-3d7-f1 | NCGC00181057-01 |     | 4    | 4    | 10.0485 | -20.6614  |
| luc-cqno-3d7-f1 | NCGC00182102-01 |    | -1.1 | -1.1 | 5.0362  | -100.0884 |
| luc-cqno-3d7-f1 | NCGC00182102-01 |   | -1.1 | -1.1 | 5.0362  | -99.3922  |
| luc-cqno-3d7-f1 | NCGC00182103-01 |  | -1.1 | -1.1 | 5.0362  | -99.0818  |
| luc-cqno-3d7-f1 | NCGC00182103-01 |  | -1.1 | -1.1 | 5.0362  | -99.2176  |

|                 |                 |                                                                                      |      |      |         |          |
|-----------------|-----------------|--------------------------------------------------------------------------------------|------|------|---------|----------|
| luc-cqno-3d7-f1 | NCGC00182104-01 | 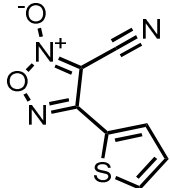    | -3   | -3   | 15.9258 | -97.549  |
| luc-cqno-3d7-f1 | NCGC00182104-01 |     | -2.1 | -2.1 | 20.0494 | -98.0267 |
| luc-cqno-3d7-f1 | NCGC00182105-01 |    | 4    | 4    | 0.0225  | -13.8462 |
| luc-cqno-3d7-f1 | NCGC00182105-01 |  | 4    | 4    |         | -14.4089 |
| luc-cqno-3d7-f1 | NCGC00182106-01 |  | -1.1 | -1.1 | 5.6507  | -98.3544 |
| luc-cqno-3d7-f1 | NCGC00182106-01 |  | -1.1 | -1.1 | 5.0362  | -97.8622 |

|                 |                 |                                                                                      |      |      |         |          |
|-----------------|-----------------|--------------------------------------------------------------------------------------|------|------|---------|----------|
| luc-cqno-3d7-f1 | NCGC00182107-01 | 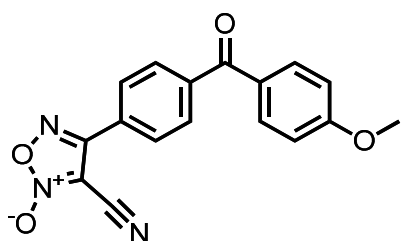   | -2.3 | -2.3 | 17.8691 | -98.7026 |
| luc-cqno-3d7-f1 | NCGC00182107-01 |    | -2.1 | -2.1 | 17.8691 | -98.4043 |
| luc-cqno-3d7-f1 | NCGC00182108-01 |    | -2.1 | -2.1 | 15.9258 | -98.9764 |
| luc-cqno-3d7-f1 | NCGC00182108-01 |   | -2.1 | -2.1 | 8.9557  | -98.1001 |
| luc-cqno-3d7-f1 | NCGC00182109-01 |  | -2.1 | -2.1 | 11.2746 | -98.8654 |
| luc-cqno-3d7-f1 | NCGC00182109-01 |  | -2.1 | -2.1 | 7.9818  | -97.9922 |



|                 |                 |                                                                                      |      |      |        |          |
|-----------------|-----------------|--------------------------------------------------------------------------------------|------|------|--------|----------|
| luc-cqno-3d7-f1 | NCGC00183324-01 | 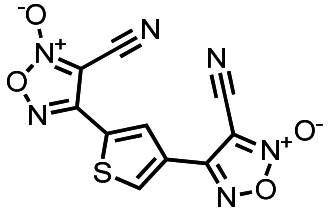   | -1.1 | -1.2 | 5.6507 | -99.122  |
| luc-cqno-3d7-f1 | NCGC00183324-01 |    | -1.1 | -1.1 | 5.6507 | -99.3313 |
| luc-cqno-3d7-f1 | NCGC00183677-01 |    | -1.1 | -1.1 | 6.3402 | -99.055  |
| luc-cqno-3d7-f1 | NCGC00183677-01 |   | -1.1 | -1.1 | 6.3402 | -99.8472 |
| luc-cqno-3d7-f1 | NCGC00186421-01 |  | -1.1 | -1.1 | 0.0142 | -98.4042 |
| luc-cqno-3d7-f1 | NCGC00186421-01 |  | -1.1 | -1.1 | 0.0127 | -98.5355 |

|                 |                 |                                                                                      |      |      |         |           |
|-----------------|-----------------|--------------------------------------------------------------------------------------|------|------|---------|-----------|
| luc-cqno-3d7-f1 | NCGC00241830-01 | 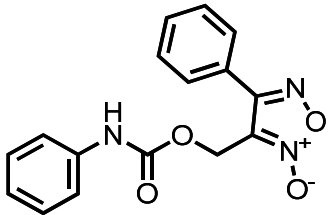   | -2.3 | -2.1 | 20.0494 | -81.0678  |
| luc-cqno-3d7-f1 | NCGC00241830-01 |    | -2.4 | -2.4 | 15.9258 | -65.2873  |
| luc-cqno-3d7-f1 | NCGC00241831-01 |    | -1.1 | -1.1 | 6.3402  | -102.7331 |
| luc-cqno-3d7-f1 | NCGC00241831-01 |  | -1.1 | -1.1 | 5.6507  | -103.0998 |
| luc-cqno-3d7-f1 | NCGC00241832-01 |  | -1.1 | -1.1 | 6.3402  | -103.2446 |
| luc-cqno-3d7-f1 | NCGC00241832-01 |  | -1.1 | -1.1 | 5.0362  | -103.3635 |

|                 |                 |  |      |      |         |           |
|-----------------|-----------------|--|------|------|---------|-----------|
| luc-cqno-3d7-f1 | NCGC00241833-01 |  | -1.1 | -1.1 | 5.6507  | -102.5205 |
| luc-cqno-3d7-f1 | NCGC00241833-01 |  | -1.1 | -1.1 | 5.6507  | -102.7591 |
| luc-cqno-3d7-f1 | NCGC00241834-01 |  | 4    | 4    |         | -39.8133  |
| luc-cqno-3d7-f1 | NCGC00241834-01 |  | -3   | -3   | 20.0494 | -51.0721  |
| luc-cqno-3d7-f1 | NCGC00244249-02 |  | -2.1 | -2.1 | 10.0485 | -98.2014  |
| luc-cqno-3d7-f1 | NCGC00244249-02 |  | -2.1 | -2.1 | 15.9258 | -97.916   |

|                 |                 |                                                                                      |      |      |        |           |
|-----------------|-----------------|--------------------------------------------------------------------------------------|------|------|--------|-----------|
| luc-cqno-3d7-f1 | NCGC00244883-01 | 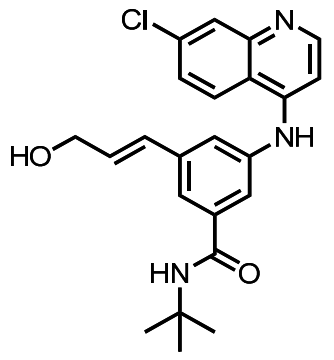   | -1.1 | -1.1 | 1.5926 | -95.1101  |
| luc-cqno-3d7-f1 | NCGC00244883-01 |    | -1.1 | -1.1 | 1.5926 | -90.7117  |
| luc-cqno-3d7-f1 | NCGC00244884-01 |    | -1.1 | -1.1 | 5.0362 | -101.1283 |
| luc-cqno-3d7-f1 | NCGC00244884-01 |   | -1.1 | -1.1 | 4.0004 | -102.8528 |
| luc-cqno-3d7-f1 | NCGC00244885-01 |  | -1.1 | -1.1 | 0.2005 | -102.8575 |

|                 |                 |                                                                                      |      |      |        |           |
|-----------------|-----------------|--------------------------------------------------------------------------------------|------|------|--------|-----------|
| luc-cqno-3d7-f1 | NCGC00244885-01 | 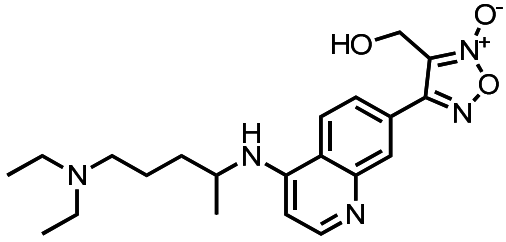   | -1.1 | -1.1 | 0.2005 | -102.91   |
| luc-cqno-3d7-f1 | NCGC00244886-01 |     | -1.1 | -1.1 | 5.0362 | -99.4977  |
| luc-cqno-3d7-f1 | NCGC00244886-01 |     | -1.1 | -1.1 | 5.0362 | -91.1268  |
| luc-cqno-3d7-f1 | NCGC00244887-01 |  | -1.1 | -1.1 | 0.0711 | -100.4364 |
| luc-cqno-3d7-f1 | NCGC00244887-01 |  | -1.1 | -1.1 | 0.0634 | -100.3298 |

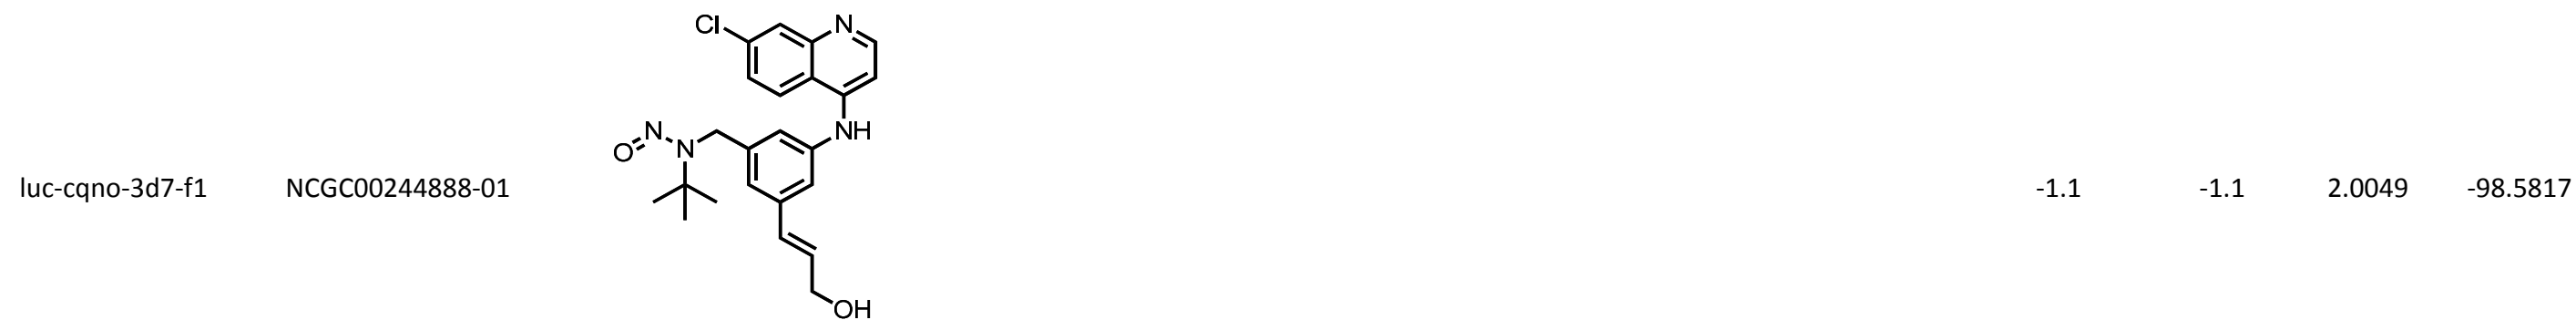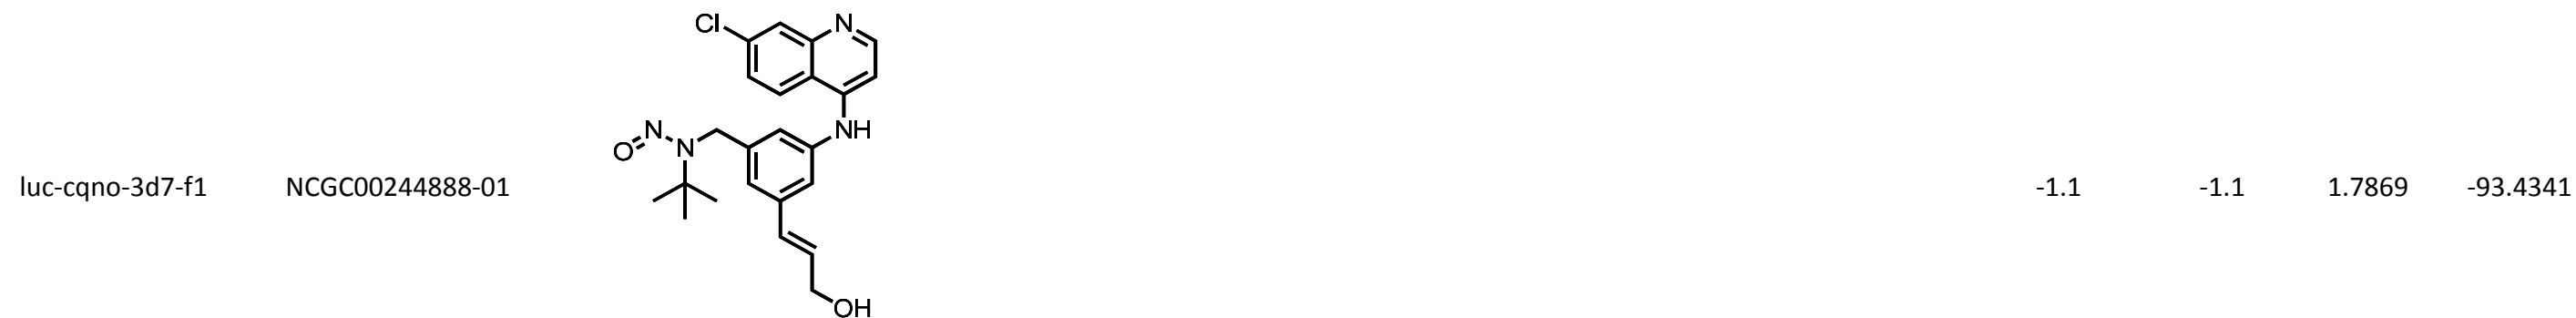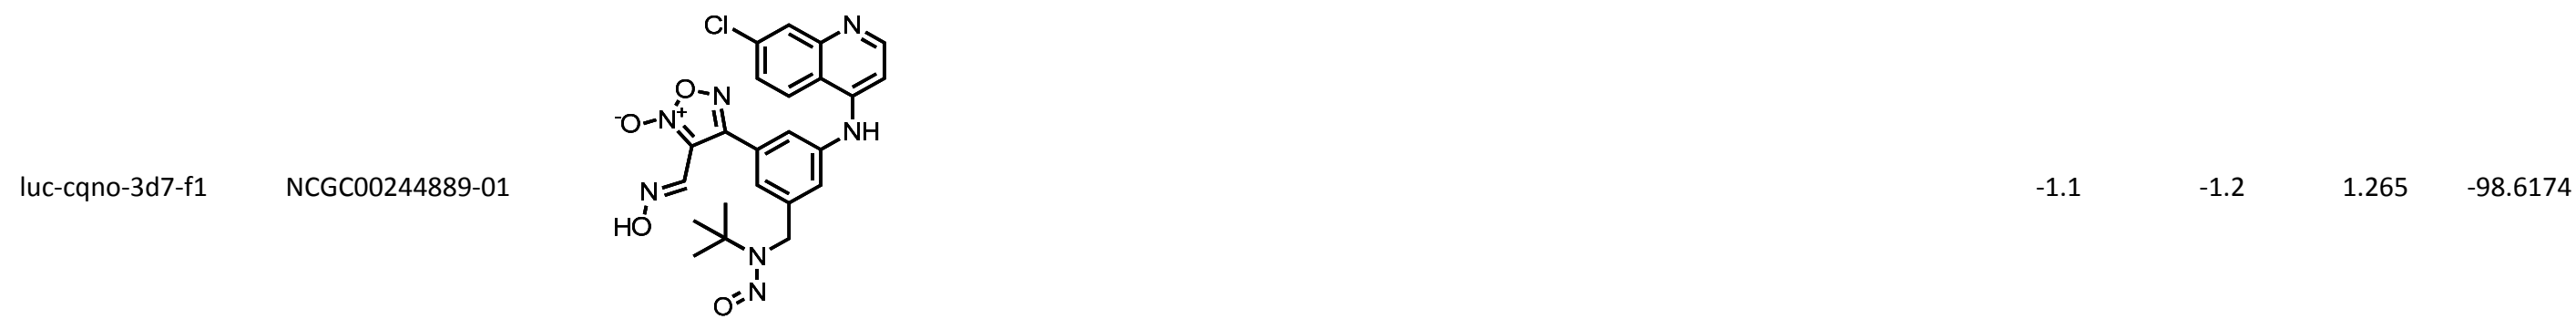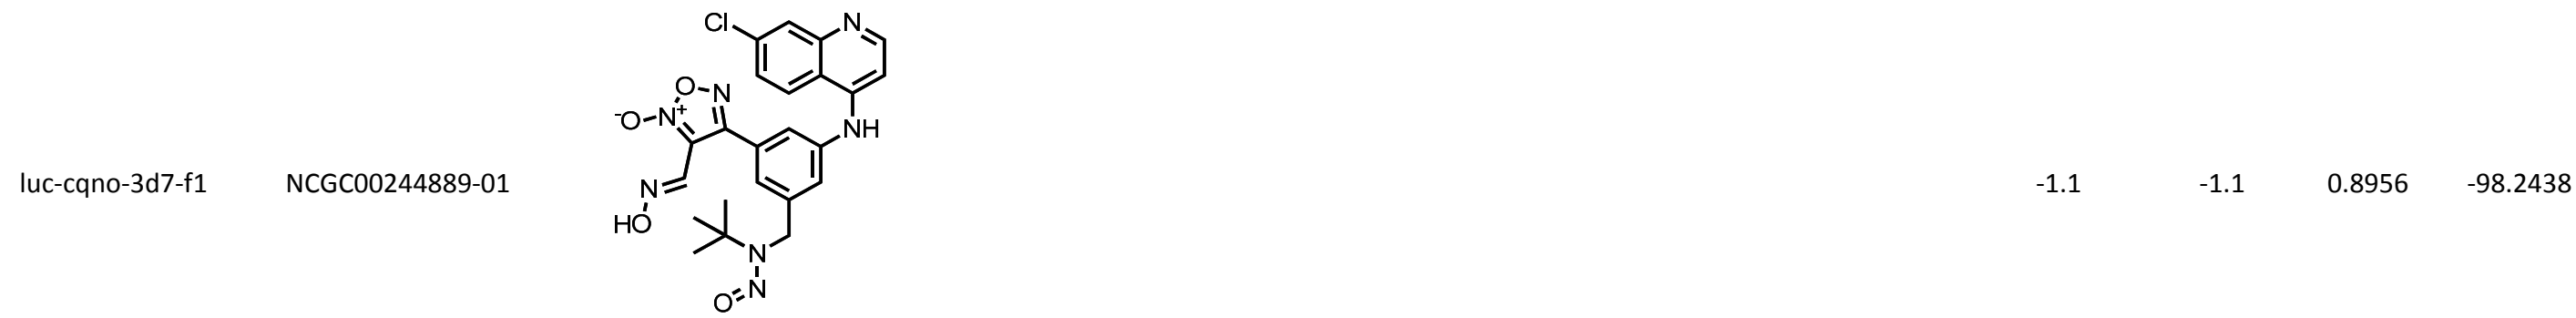

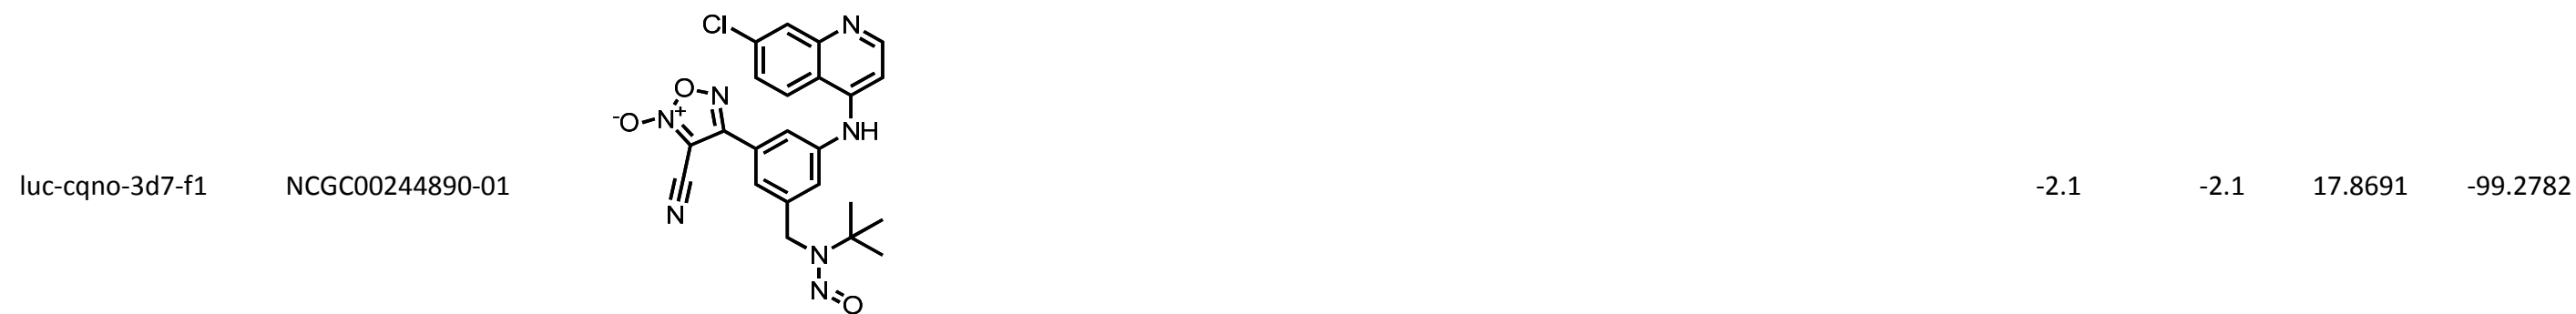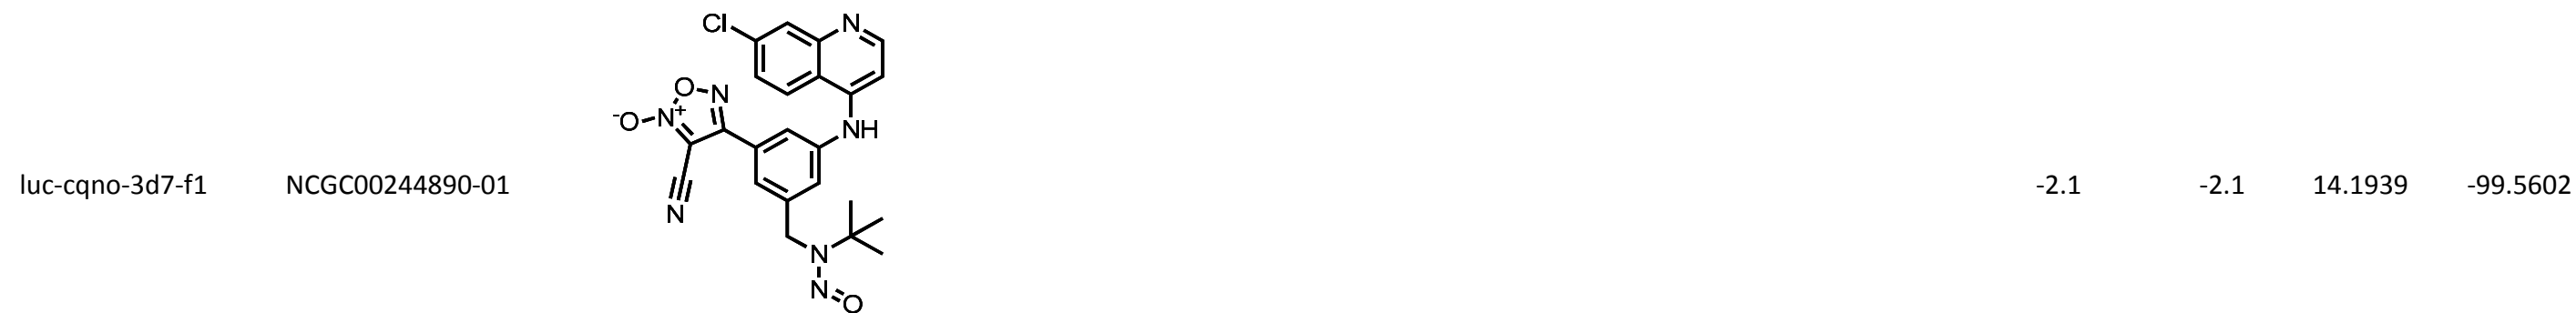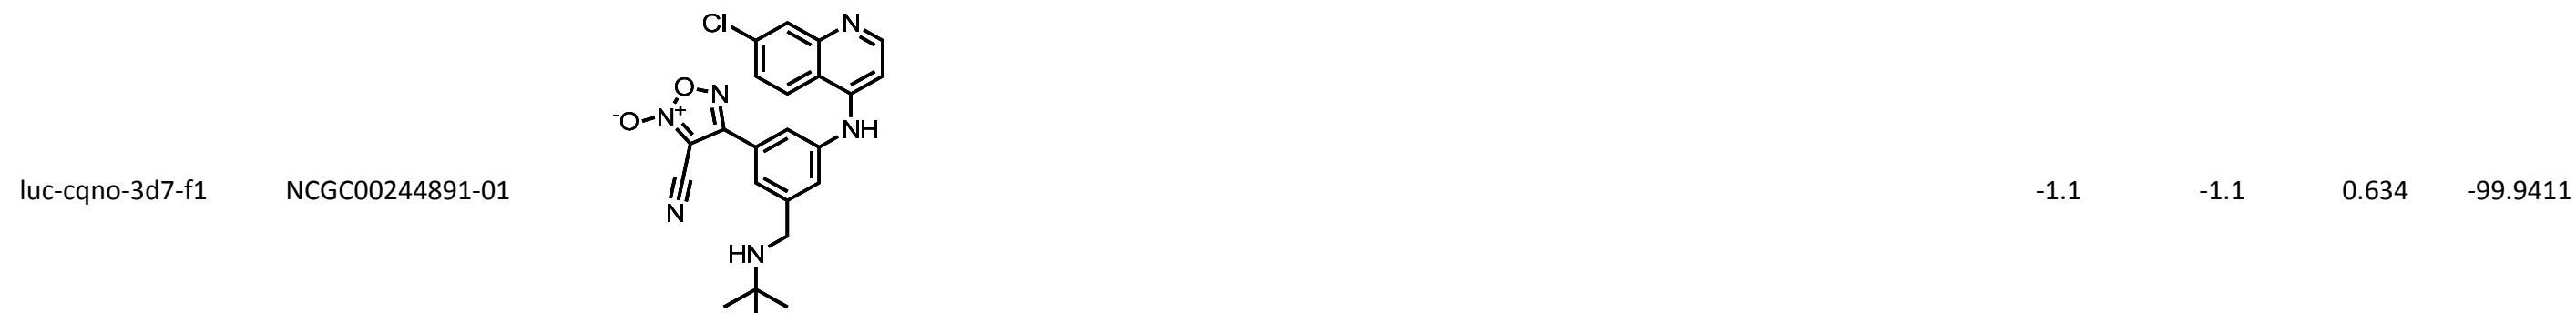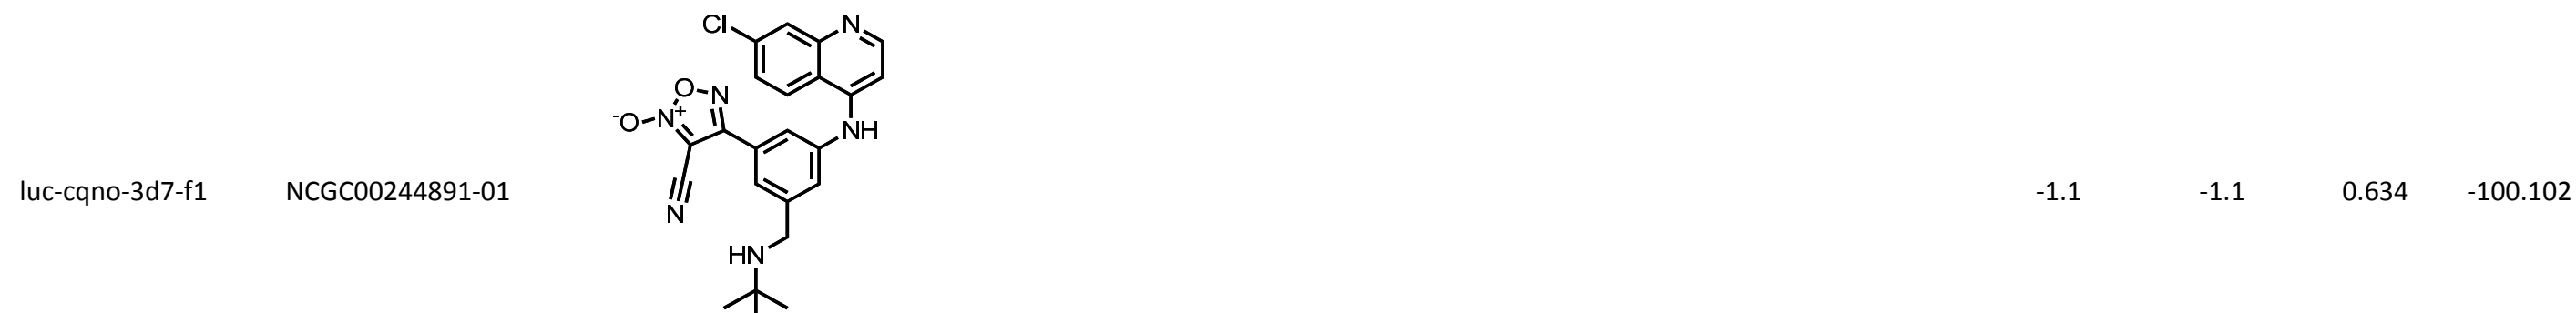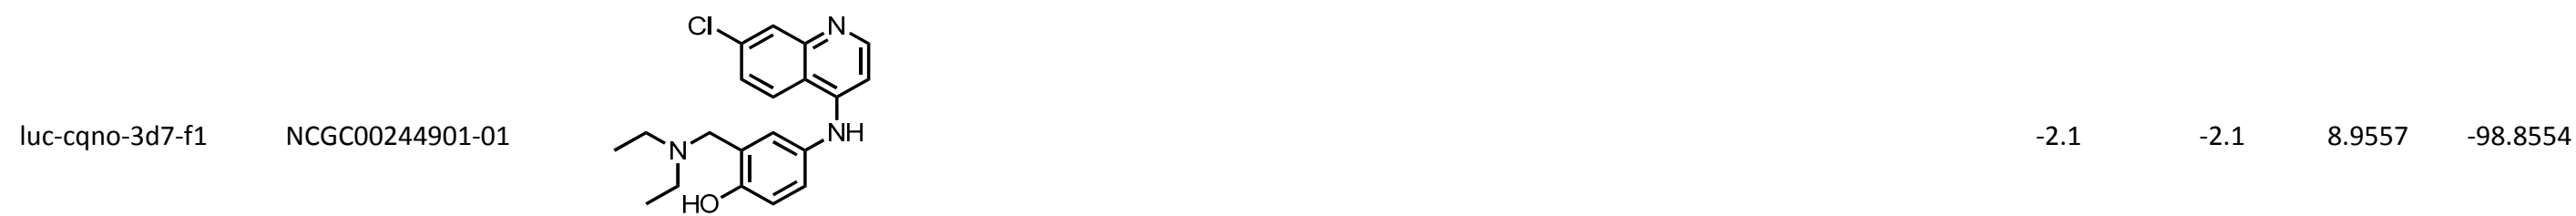

luc-cqno-3d7-f1

NCGC00244901-01

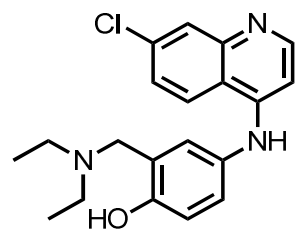

-2.3

-2.1

12.6503

-98.3248
